## RETRACTION

# Retraction: Unveiling the economic potential of sports industry in China: A data driven analysis

The *PLOS ONE* Editors

The *PLOS ONE* Editors retract this article [1] because it was identified as one of a series of submissions for which we have concerns about the article's adherence to *PLOS ONE*'s Ethical Publishing Practice polices, including but not restricted to concerns about the authorship, integrity of the underlying data, and reliability of the published results. We regret that the issues were not identified prior to the article's publication.

The author either did not respond directly or could not be reached.

## Reference

1. Liu H (2024) Unveiling the economic potential of sports industry in China: A data driven analysis. *PLoS ONE* 19(9): e0310131. <https://doi.org/10.1371/journal.pone.0310131> PMID: 39264965

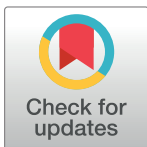

## OPEN ACCESS

**Citation:** The *PLOS ONE* Editors (2024) Retraction: Unveiling the economic potential of sports industry in China: A data driven analysis. *PLoS ONE* 19(12): e0316039. <https://doi.org/10.1371/journal.pone.0316039>

**Published:** December 13, 2024

**Copyright:** © 2024 The *PLOS ONE* Editors. This is an open access article distributed under the terms of the [Creative Commons Attribution License](https://creativecommons.org/licenses/by/4.0/), which permits unrestricted use, distribution, and reproduction in any medium, provided the original author and source are credited.
